# Supplementary material
Source: PubMed Central journal article supplement (PMC2636951)
Supplement: 90452.2008_1.pdf [file 90452.2008_1.pdf]

Supplemental figure 1:

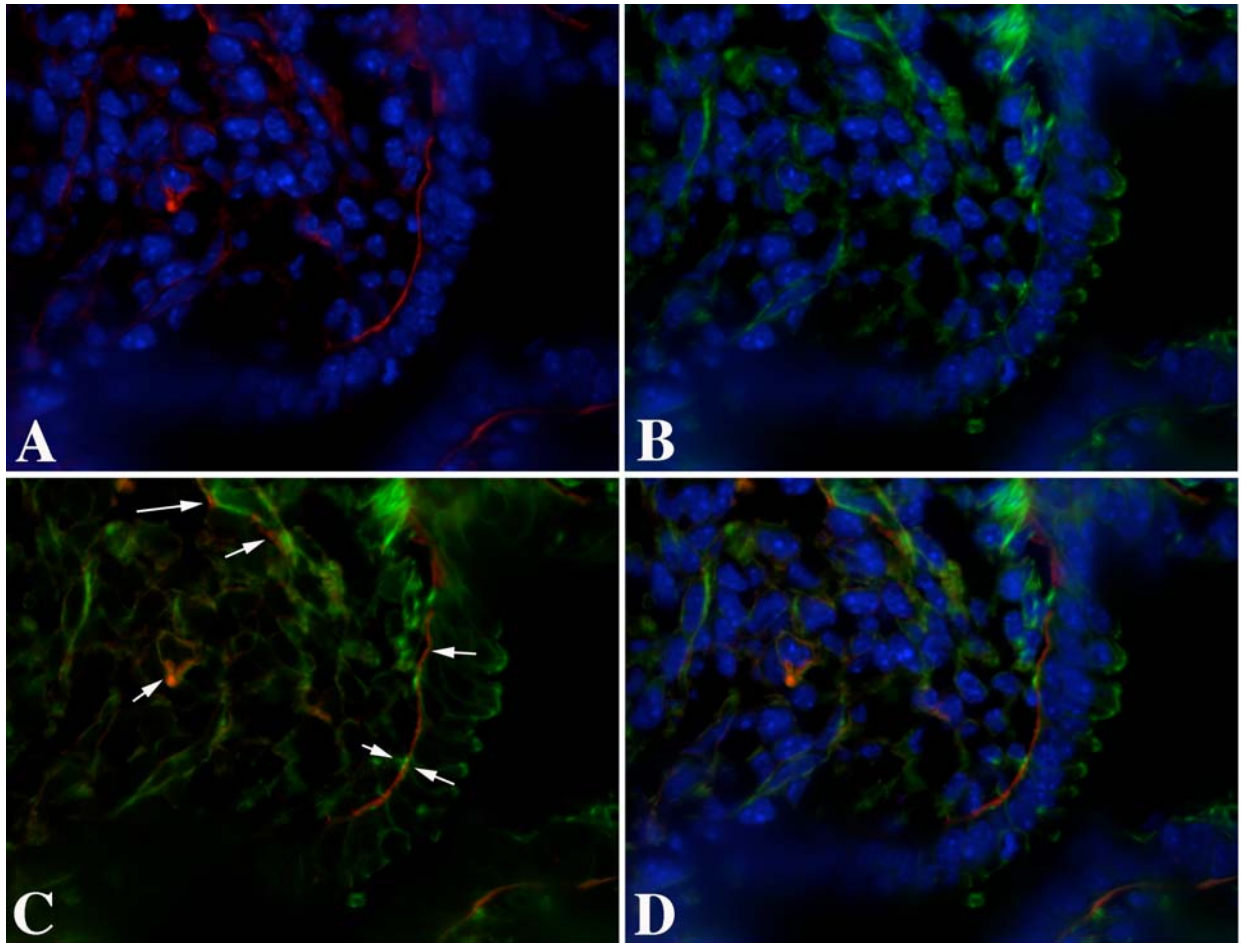

VEGF protein localizes to the basilar sub-epithelial region in E12.5 fetal mouse lungs (cy3, A,C,D) and is found sandwiched between cellular cytoskeleton actin (arrows, C) as noted by dual localization with phalloidin (FITC, B,C,D). DAPI denotes nuclear staining. Magnification: 600X.

Supplemental Figure 2:

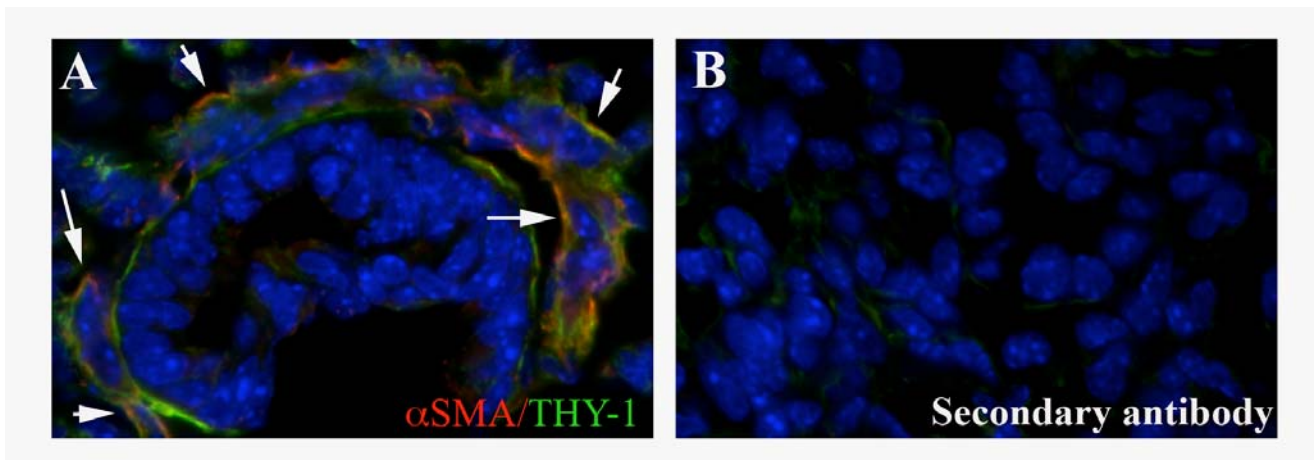

THY-1 / CD90 (Fic) co-localizes with  $\alpha$  SMA (cy3) in E13.5 fetal lungs as noted by the white arrows. Magnification: 600X

Supplemental figure 3:

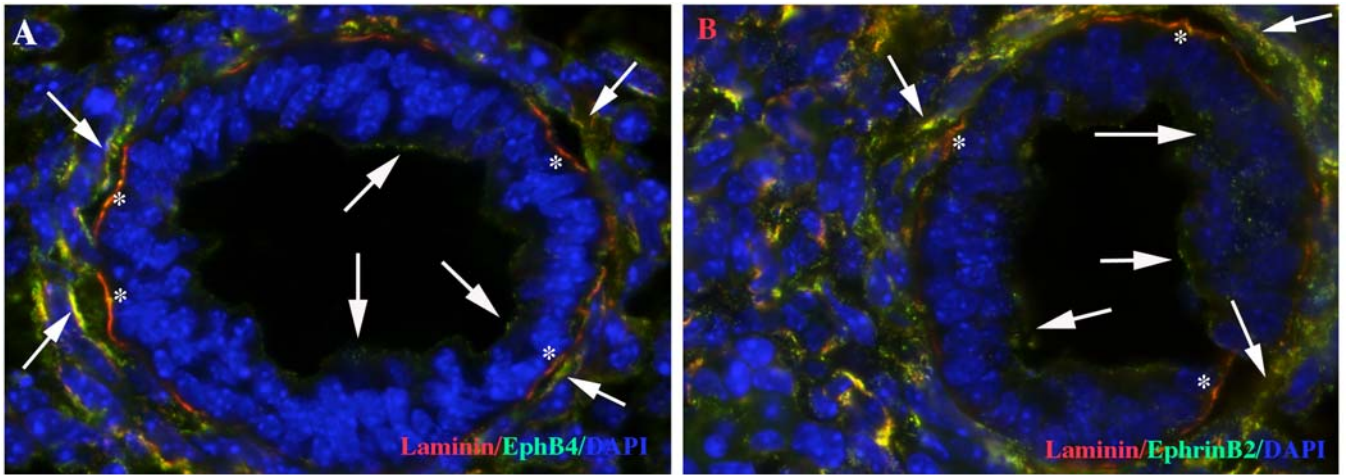

EphB4 (A) and EphrinB2 (B) expression localizes to the mesenchymal cells and epithelial cells in E13.5 fetal mouse lungs (EphB4 and EphrinB2-FITC, white arrows). Laminin (cy3 noted by \*) does not co-localize with EphB4 or EphrinB2 at the epithelial / mesenchymal interface suggesting that the EphB4 and EphrinB2 are not bound to the basement membrane in this region. Magnification 600X
